# Supplementary material
Source: MDPI journal article supplement (https://www.mdpi.com/2311-5637/7/4/201)
Supplement: s1 [file s1]

## **SUPPLEMENTARY MATERIAL**

### **Multi-Objective Sustainability Optimization of Biomass Residues to Ethanol via Gasification and Syngas Fermentation: Trade-Offs between Profitability, Energy Efficiency and Carbon Emissions**

**Elisa M. de Medeiros<sup>1,2</sup>, Henk Noorman<sup>1,3</sup>, Rubens Maciel Filho<sup>2</sup> and John A. Posada<sup>1,\*</sup>**

<sup>1</sup> Department of Biotechnology, Delft University of Technology, van der Maasweg 9, Delft, Zuid-Holland, 2629 ZH, Netherlands

<sup>2</sup> School of Chemical Engineering, University of Campinas, Av. Albert Einstein 500, Campinas, São Paulo, 13084-852, Brazil

<sup>3</sup> DSM Biotechnology Center, PO Box 1, Delft, Zuid-Holland, 2600 MA, Netherlands

\* Correspondence: J.A.PosadaDuque@tudelft.nl (J.A.P)

**Table S1. Elemental analysis (% dry basis) and moisture (%) of sugarcane bagasse and wood residues**

|                      | <b>Moisture</b> | <b>C</b> | <b>H</b> | <b>O</b> | <b>N</b> | <b>Cl</b> | <b>S</b> | <b>ash</b> |
|----------------------|-----------------|----------|----------|----------|----------|-----------|----------|------------|
| Bagasse <sup>a</sup> | 50              | 46.96    | 5.72     | 44.05    | 0.28     | 0.03      | 0.05     | 2.94       |
| Wood <sup>b</sup>    | 11.6            | 48.55    | 5.72     | 45.22    | 0.26     | 0.21      | 0.04     | 3.52       |

<sup>a</sup> Bagasse composition is the same as considered in de Medeiros et al. (2017)

<sup>b</sup> Wood residues from eucalyptus are considered the same as in Capaz et al. (2020)



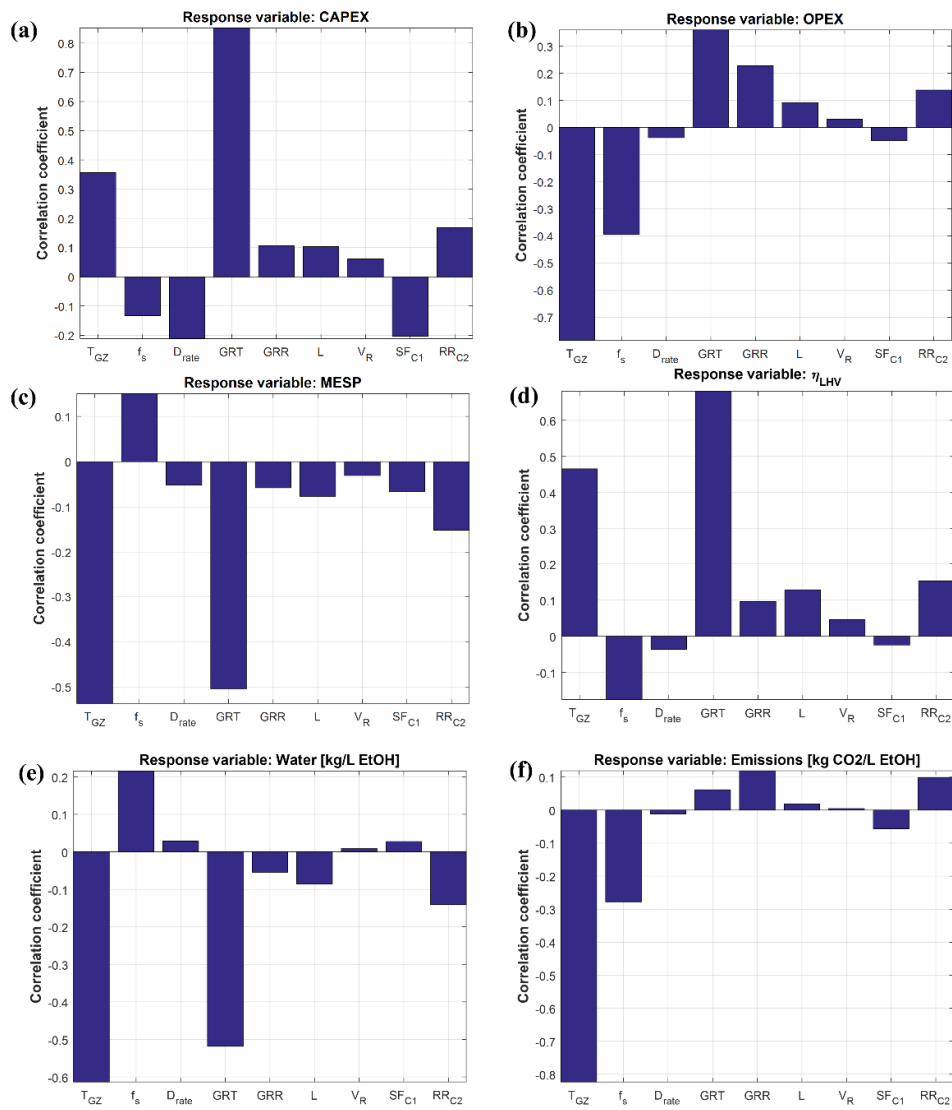

**Figure S2. Correlation coefficients between decision variables and responses: wood residues.**
